# Supplementary material for: Factors associated with allergy traits around the 2nd year of life: a brazilian cohort study
Source: Springer Nature journal article supplement (doi:10.1186/s12887-022-03772-7), 2022-12-08

## SUPPLEMENTAL MATERIAL

Figure 1. Flow diagram of the BRISA birth cohort, Ribeirão Preto, Brazil

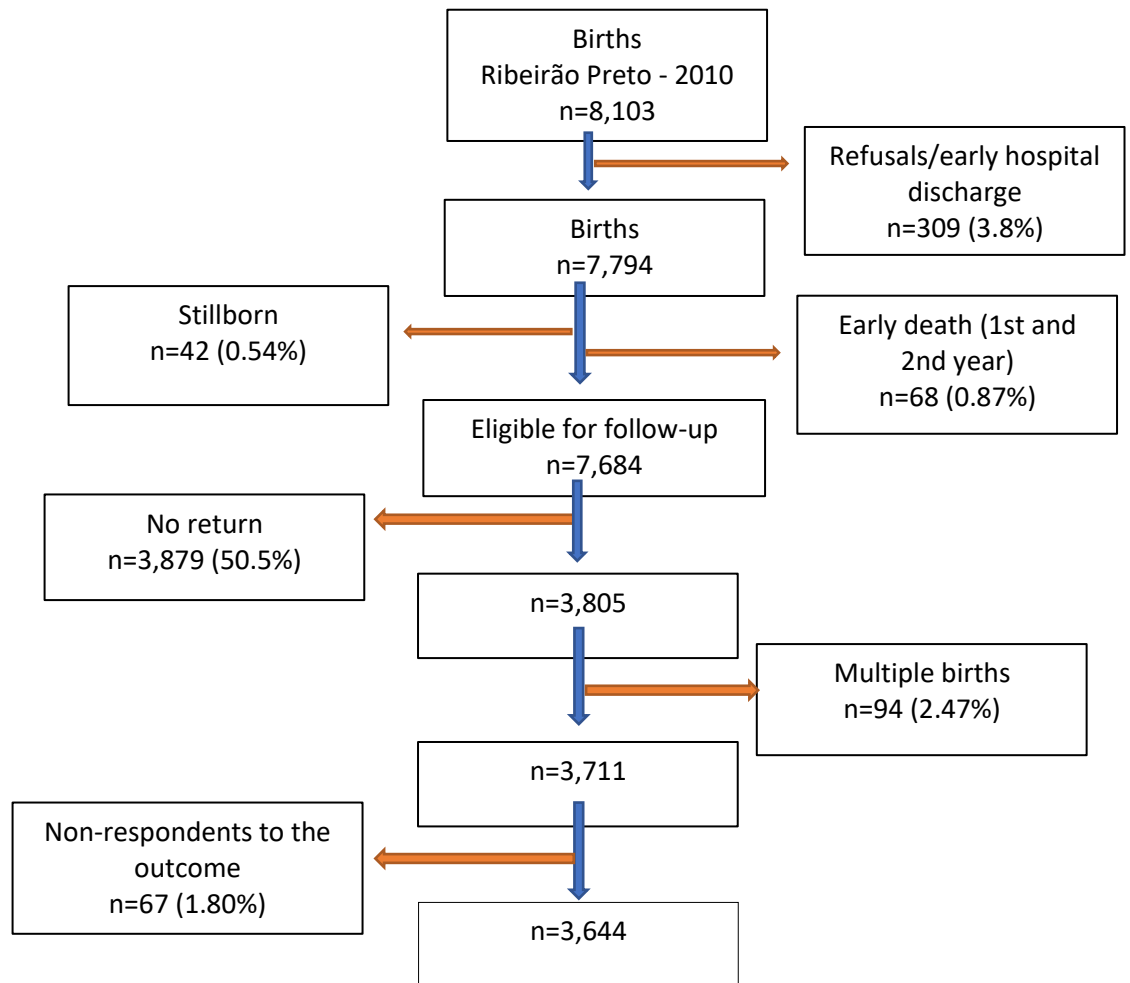

Supplement: MOESM1 [file 23803590]
